# Supplementary material
Source: Springer Nature journal article supplement (https://www.springermedizin.de/resource/supplementary/13054_2012_692_MOESM6_ESM.pdf/9709038)

PSI

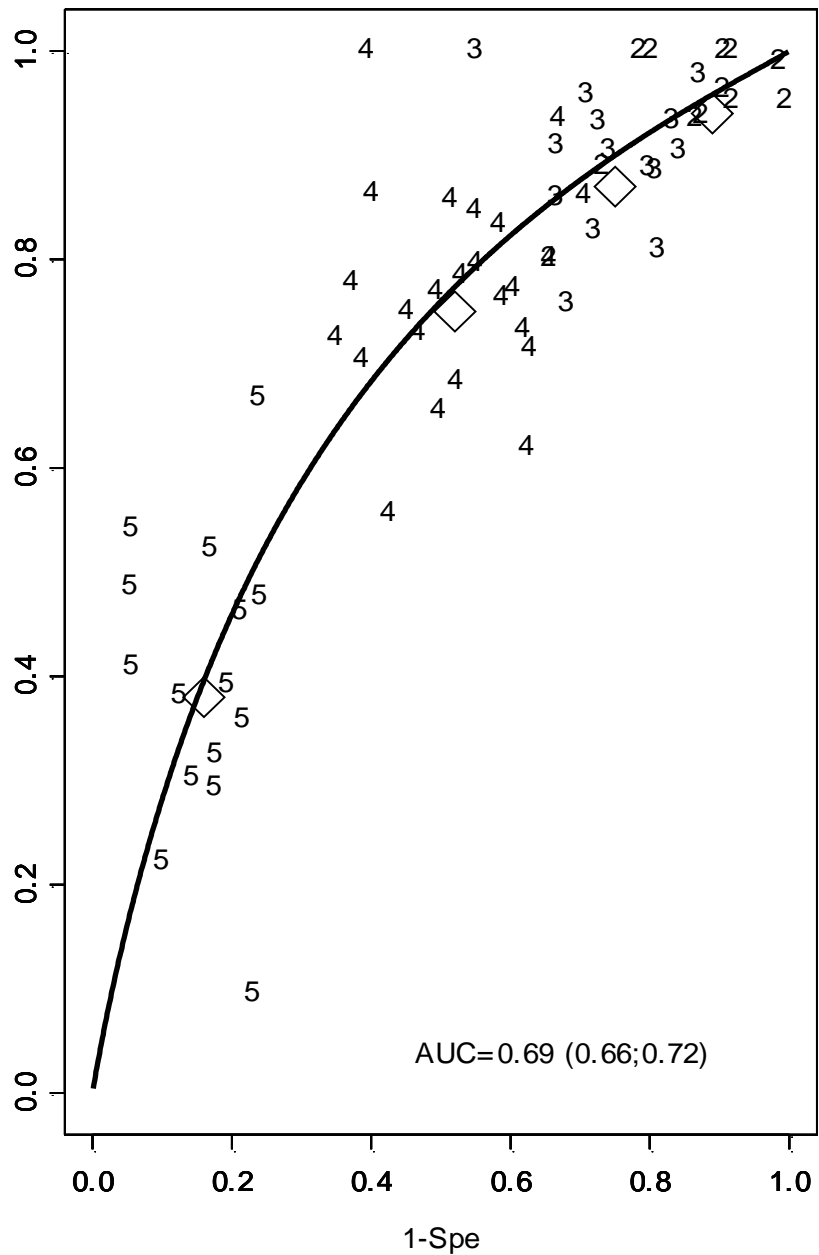

Curb65

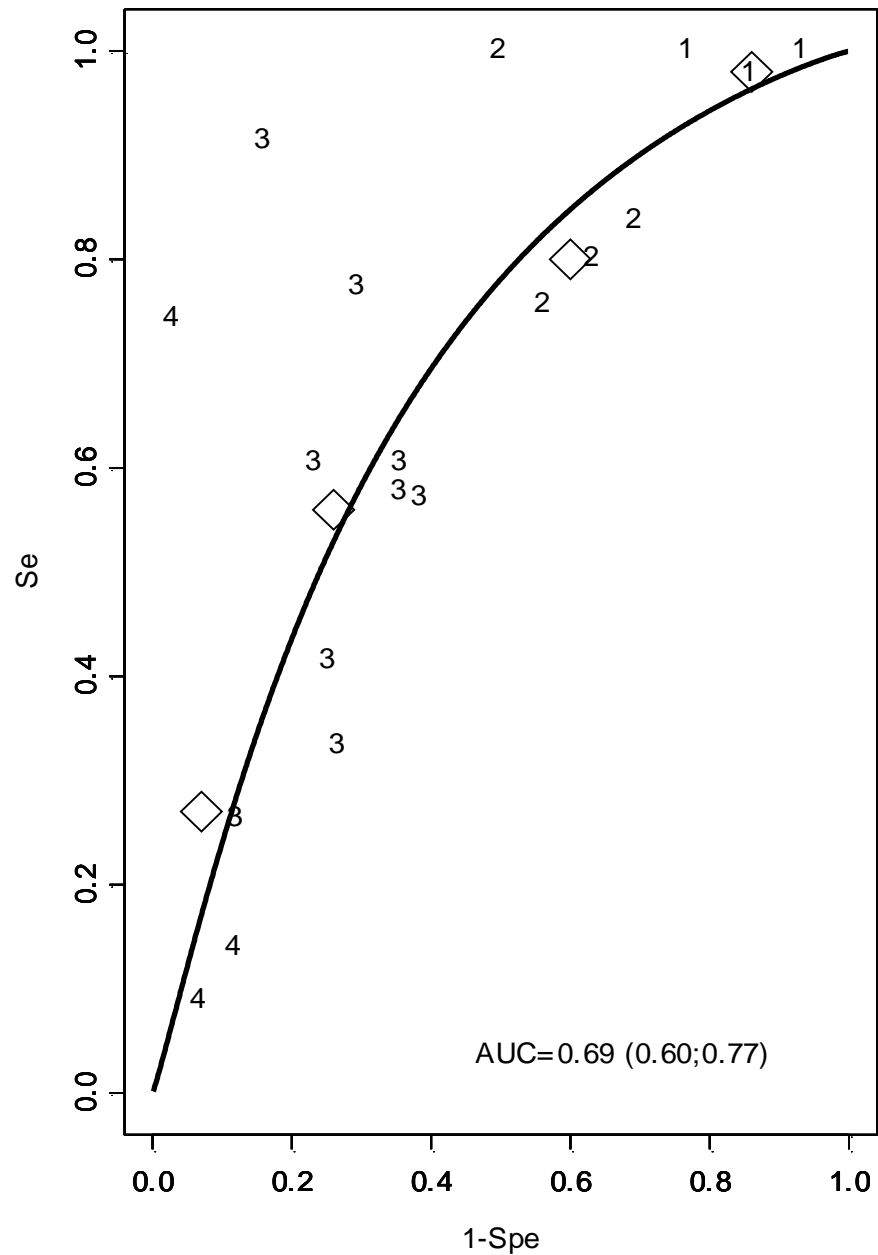

Supplement: MOESM6 [file 9709038]
